# Supplementary material for: Multiresponsive luminescent sensing behaviour of a tetraimidazole ligand and its 3D Cd(ii) metal–organic frameworks
Source: Royal Society of Chemistry journal article supplement (doi:10.1039/d4ce00469h), 2024-01-01
Supplement: d4ce00469h1.pdf [file d4ce00469h1.pdf]

## **Electronic supplementary information (ESI)**

### **Multiresponsive luminescent sensing behaviour of a tetraimidazole ligand and its 3D Cd(II) metal-organic frameworks**

Ye-Feng Wu, Jia-Jun Cheng, Tao Jiang, Yu-Chen Ma, Jia-Lei Kou, Guo-Feng Cheng, Xiu-Li Hu,  
Xiao-Yan Tang, Yun-Sheng Ma\*, Wen-Yu Yin\* and Hong-Jian Cheng\*

*School of Materials Engineering, Changshu Insititute of Technology, Changshu, Jiangsu, 215500,  
P. R. China.*

## Contents

|                                                                                                                                                                                                                                                                                                                                                                                                                                                                                                                                                                    |    |
|--------------------------------------------------------------------------------------------------------------------------------------------------------------------------------------------------------------------------------------------------------------------------------------------------------------------------------------------------------------------------------------------------------------------------------------------------------------------------------------------------------------------------------------------------------------------|----|
| <b>Preparation of timpb</b> .....                                                                                                                                                                                                                                                                                                                                                                                                                                                                                                                                  | S4 |
| <b>Fig. S1.</b> $^1\text{H}$ NMR spectra of timpb.....                                                                                                                                                                                                                                                                                                                                                                                                                                                                                                             | S4 |
| <b>Fig. S2.</b> PXRD patterns for <b>1</b> and <b>2</b> . simulated (red) and single-phase polycrystalline (black) sample of <b>1</b> or <b>2</b> .....                                                                                                                                                                                                                                                                                                                                                                                                            | S4 |
| <b>Fig. S3</b> (a) FT-IR spectra of <b>1</b> with qtimpb and 1,4- $\text{H}_2\text{bdc}$ ; (b) FT-IR spectra of <b>2</b> with qtim and 4,4'- $\text{H}_2\text{bpd}$ .....                                                                                                                                                                                                                                                                                                                                                                                          | S5 |
| <b>Fig. S4</b> (a) 2D net constructed by [Cd(1,4- $\text{bdc}$ )] units in <b>1</b> (looking down the $a$ axis); (b) 1D chain constructed by [Cd(4,4'- $\text{bpd}$ )] units in <b>2</b> (looking down the $a$ axis).....                                                                                                                                                                                                                                                                                                                                          | S5 |
| <b>Fig. S5</b> The 3D structure of <b>2</b> containing solvent molecules looking down the $b$ axis (a) or the $a$ axis.....                                                                                                                                                                                                                                                                                                                                                                                                                                        | S5 |
| <b>Table S1.</b> Selected bond lengths ( $\text{\AA}$ ) and angles ( $^\circ$ ) of <b>1</b> and <b>2</b> .....                                                                                                                                                                                                                                                                                                                                                                                                                                                     | S6 |
| <b>Fig. S6</b> (a) The TGA curves for <b>1</b> ; (b) The TGA curves for <b>2</b> .....                                                                                                                                                                                                                                                                                                                                                                                                                                                                             | S7 |
| <b>Fig. S7</b> (a) UV-visible absorbance spectra of timpb ( $10^{-6}$ M) with successively increasing concentration of $\text{Fe}^{3+}$ ions ( $10^{-4}$ M) from 10 to 100 $\mu\text{L}$ ; (b) UV-visible absorbance spectra of timpb ( $10^{-6}$ M) with successively increasing concentration of $\text{Cu}^{2+}$ ions ( $10^{-4}$ M) from 10 to 150 $\mu\text{L}$ ; (c) UV-visible absorbance spectra of timpb ( $10^{-6}$ M) with successively increasing concentration of $\text{Cr}_2\text{O}_7^{2-}$ ions ( $10^{-4}$ M) from 10 to 100 $\mu\text{L}$ ..... | S7 |
| <b>Fig. S8</b> Fluorescence emission spectra of <b>1</b> in different organic solvents.....                                                                                                                                                                                                                                                                                                                                                                                                                                                                        | S7 |
| <b>Fig. S9</b> (a) Fluorescent sensing responses of timpb ( $10^{-6}$ M) upon addition of 100 $\mu\text{L}$ of various anions ( $10^{-4}$ M) in water; (b) Fluorescence titration profile of timpb ( $10^{-6}$ M) with successively increasing concentration of $\text{Cr}_2\text{O}_7^{2-}$ ions ( $10^{-4}$ M) from 5 to 45 $\mu\text{L}$ ; (c) $K_{\text{sv}}$ plot of timpb for sensing of $\text{Cr}_2\text{O}_7^{2-}$ (inset: the linear correlation at higher concentrations).....                                                                          | S8 |
| <b>Fig. S10</b> (a) Fluorescent sensing responses of <b>1</b> upon addition of 50 $\mu\text{L}$ of various anions ( $10^{-4}$ M) in water; (b) Fluorescence titration profile of <b>1</b> with successively increasing concentration of $\text{Cr}_2\text{O}_7^{2-}$ ions ( $10^{-4}$ M) from 5 to 100 $\mu\text{L}$ ; (c) $K_{\text{sv}}$ plot of <b>1</b> for sensing of $\text{Cr}_2\text{O}_7^{2-}$ (inset: the linear correlation at higher concentrations).....                                                                                              | S8 |
| <b>Table S2.</b> Comparison of the detection limits of previously reported sensors with our work for the detection of $\text{Cu}^{2+}$ , $\text{Fe}^{3+}$ or $\text{Cr}_2\text{O}_7^{2-}$ ions.....                                                                                                                                                                                                                                                                                                                                                                | S9 |
| <b>Fig. S11</b> (a) UV-visible absorbance spectra of timpb ( $10^{-6}$ M) with successively increasing concentration of $\text{Fe}^{3+}$ ions ( $10^{-4}$ M) from 10 to 100 $\mu\text{L}$ ; (b) UV-visible absorbance spectra of                                                                                                                                                                                                                                                                                                                                   |    |

timpb ( $10^{-6}$  M) with successively increasing concentration of  $\text{Cu}^{2+}$  ions ( $10^{-4}$  M) from 10 to 150  $\mu\text{L}$ ; (c) UV-visible absorbance spectra of timpb ( $10^{-6}$  M) with successively increasing concentration of  $\text{Cr}_2\text{O}_7^{2-}$  ions ( $10^{-4}$  M) from 10 to 100  $\mu\text{L}$ ; (d) Fluorescent recovery responses of 2 mL timpb ( $10^{-6}$  M) + 70  $\mu\text{L}$   $\text{Cu}^{2+}$  ions ( $10^{-4}$  M) upon addition of EDTA ( $10^{-4}$  M).·····S10

**Fig. S12** FTIR spectra of **1** before and after sensing concentrations of  $\text{Fe}^{3+}$  (a) and  $\text{Cr}_2\text{O}_7^{2-}$  (c) at room temperature.·····S10

**Fig. S13** PXRD patterns exhibited by complex **1** after immersion in various solvents for 3 days.·····S10

**Fig. S14** PXRD patterns exhibited by complex **1** after immersion in aqueous solutions containing  $\text{Fe}^{3+}$  or  $\text{Cr}_2\text{O}_7^{2-}$ .·····S11

**Fig. S15** The emission spectra of **1** in the solid state after immersion in aqueous solutions containing  $\text{Fe}^{3+}$  or  $\text{Cr}_2\text{O}_7^{2-}$ .·····S11

### Preparation of *timpb*

A 10 mL deep porcelain crucible was filled with a mixture of 2.24 g (5.0 mmol) 1,3-dibromo-5-(3,5-dibromo-phenoxy)methyl)-benzene, 6.808 g (100.0 mmol) imidazole, 4.146 g (30.0 mmol) anhydrous potassium carbonate and 0.380 g (2.0 mmol) cuprous iodide. The reaction mixture was exposed to microwave irradiation at different temperatures and times. After cooling to room temperature, the residue was diluted with 20 mL H<sub>2</sub>O. 0.292 g (1 mmol) ethylenediaminetetraacetic acid and 4 mL NH<sub>3</sub>·H<sub>2</sub>O (28-29 %) was added, and the resulting mixture was stirred at room temperature for 24 h. The resulting dark brown precipitate was filtered and further purified by recrystallization in methanol to form light gray powder of *timpb*. Yield: 1.137 g (76 %). Anal. Calcd for C<sub>25</sub>H<sub>20</sub>N<sub>8</sub>O: C 66.95; H 4.49; N 24.99; found C 67.34; H 4.36; N 24.26. IR (KBr, cm<sup>-1</sup>): 3098(w), 1654(m), 1509(s), 1475(w), 1399(m), 1340(m), 1247(w), 1111(w), 1058(m), 960(w), 912(w), 829(m), 730(m), 525(m). <sup>1</sup>H NMR (DMSO-*d*<sub>6</sub>, 400 MHz, ppm) δ 8.47 (s, 4H), 8.01 (s, 1H), δ 7.95 (s, 3H), 7.83 (s, 2H), 7.64 (s, 1H), δ 7.43 (s, 2H), 7.18 (s, 3H), 5.37 (s, 2H).

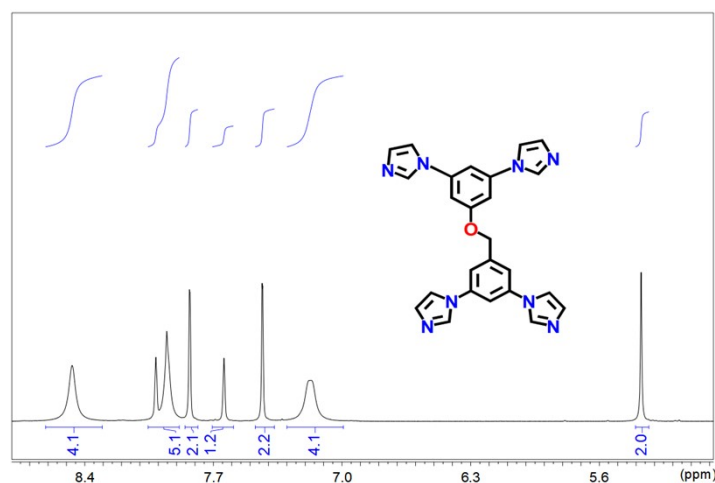

Fig. S1. <sup>1</sup>H NMR spectra of *timpb*.

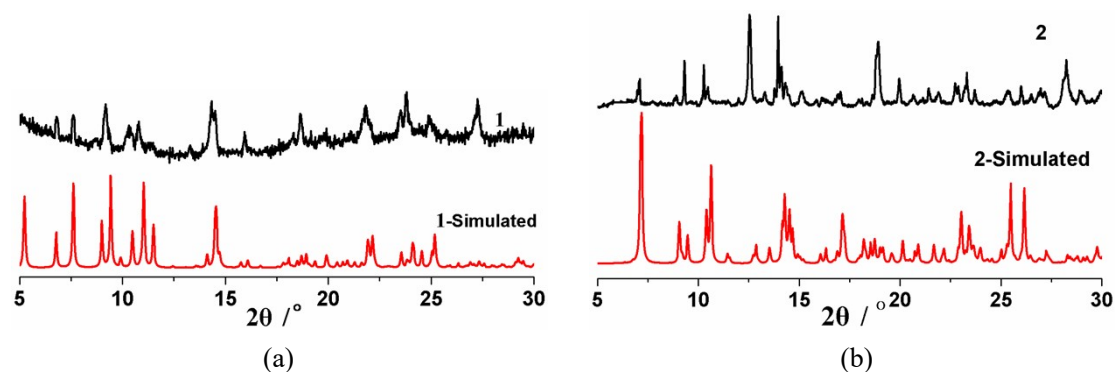

Fig. S2. PXRD patterns for **1** and **2**. simulated (red) and single-phase polycrystalline (black) sample of **1** or **2**.

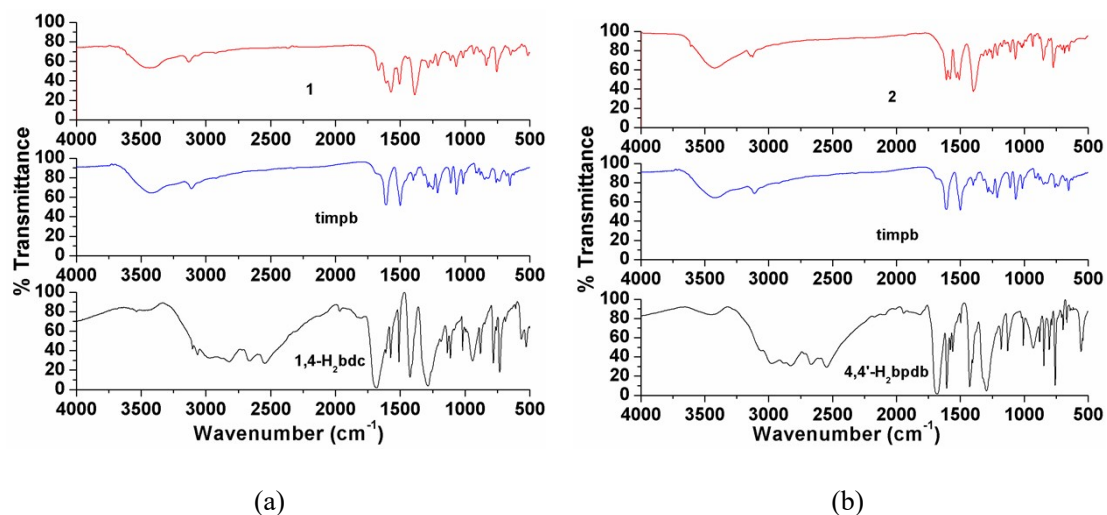

**Fig. S3** (a) FT-IR spectra of **1** with timpb and 1,4-H<sub>2</sub>bdc; (b) FT-IR spectra of **2** with timpb and 4,4'-H<sub>2</sub>bpbdb.

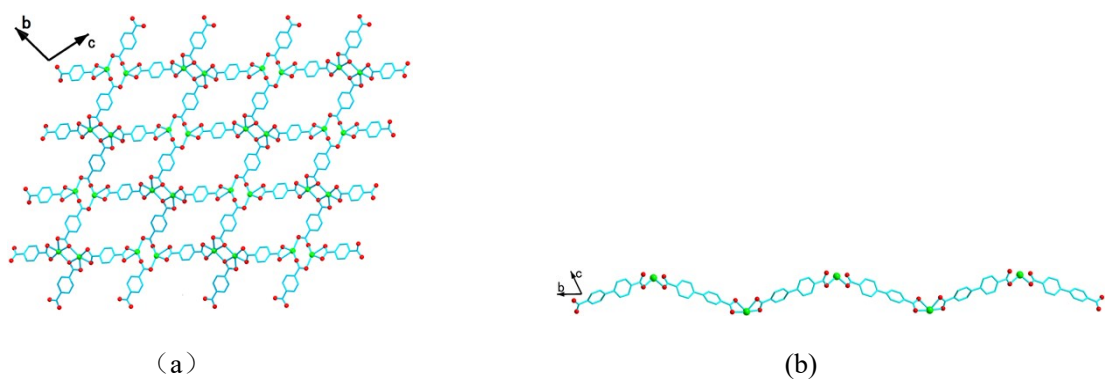

**Fig. S4** (a) 2D net constructed by [Cd(1,4-bdc)] units in **1** (looking down the *a* axis); (b) 1D chain constructed by [Cd(4,4'-bpbdb)] units in **2** (looking down the *a* axis).

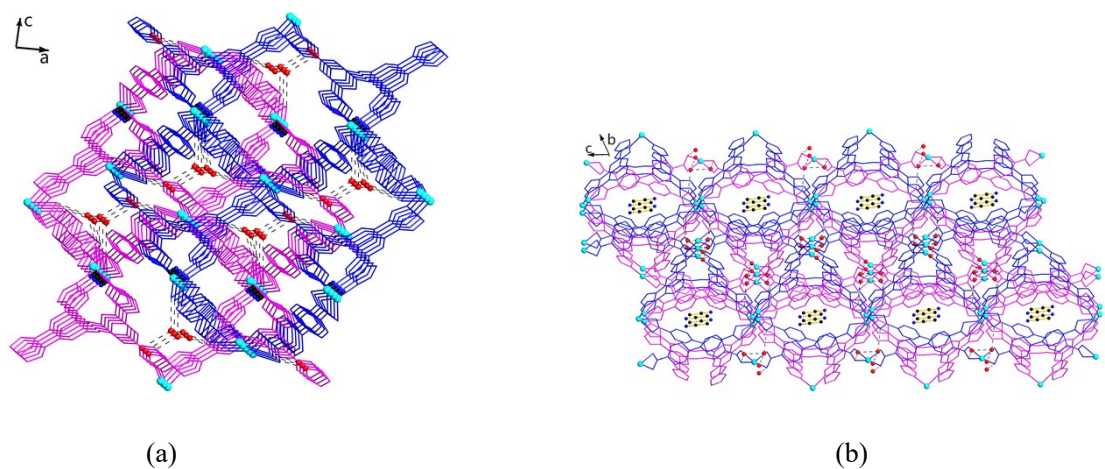

**Fig. S5** The 3D structure of **2** containing solvent molecules looking down the *b* axis (a) or the *a* axis.

**Table S1.** Selected bond lengths (Å) and angles (°) of **1** and **2****Complex 1**

|                     |           |                   |            |
|---------------------|-----------|-------------------|------------|
| Cd(1)-N(1)          | 2.269(6)  | Cd(1)-N(5)#1      | 2.303(6)   |
| Cd(1)-O(6)          | 2.303(6)  | Cd(1)-O(7)#2      | 2.321(6)   |
| Cd(1)-O(2)          | 2.351(6)  | Cd(1)-O(3)        | 2.528(7)   |
| Cd(2)-N(3)          | 2.266(7)  | Cd(2)-N(7)#3      | 2.283(6)   |
| Cd(2)-O(9)#4        | 2.343(6)  | Cd(2)-O(4)#5      | 2.365(6)   |
| Cd(2)-O(8)#2        | 2.372(6)  | Cd(2)-O(5)#5      | 2.458(6)   |
| Cd(2)-O(9)#2        | 2.553(6)  |                   |            |
| N(1)-Cd(1)-N(5)#1   | 174.9(2)  | N(1)-Cd(1)-O(6)   | 101.1(2)   |
| N(5)#1-Cd(1)-O(6)   | 82.2(2)   | N(1)-Cd(1)-O(7)#2 | 91.8(2)    |
| N(5)#1-Cd(1)-O(7)#2 | 83.1(2)   | O(6)-Cd(1)-O(7)#2 | 121.66(19) |
| N(1)-Cd(1)-O(2)     | 91.9(2)   | N(5)#1-Cd(1)-O(2) | 92.1(2)    |
| O(6)-Cd(1)-O(2)     | 89.3(2)   | O(7)#2-Cd(1)-O(2) | 147.3(2)   |
| N(1)-Cd(1)-O(3)     | 90.2(2)   | N(5)#1-Cd(1)-O(3) | 89.7(2)    |
| O(6)-Cd(1)-O(3)     | 141.0(2)  | O(7)#2-Cd(1)-O(3) | 94.8(2)    |
| O(2)-Cd(1)-O(3)     | 52.75(18) | N(3)-Cd(2)-N(7)#3 | 174.2(2)   |
| Cd(1)-N(1)          | 2.269(6)  | Cd(1)-N(5)#1      | 2.303(6)   |

**Complex 2**

|                     |            |                     |            |
|---------------------|------------|---------------------|------------|
| Cd(1)-O(3)          | 2.201(4)   | Cd(1)-O(7)          | 2.215(4)   |
| Cd(1)-N(1)          | 2.246(4)   | Cd(1)-N(8)#1        | 2.251(5)   |
| Cd(2)-N(3)          | 2.258(4)   | Cd(2)-O(5)#2        | 2.270(4)   |
| Cd(2)-N(5)#3        | 2.293(5)   | Cd(2)-O(8)#4        | 2.354(4)   |
| Cd(2)-O(9)#4        | 2.370(4)   | Cd(2)-O(4)#2        | 2.471(4)   |
| O(3)-Cd(1)-O(7)     | 104.79(15) | O(3)-Cd(1)-N(1)     | 95.35(16)  |
| O(7)-Cd(1)-N(1)     | 131.90(15) | O(3)-Cd(1)-N(8)#    | 132.16(17) |
| O(7)-Cd(1)-N(8)#1   | 90.54(16)  | N(1)-Cd(1)-N(8)#1   | 107.49(17) |
| N(3)-Cd(2)-O(5)#2   | 96.82(17)  | N(3)-Cd(2)-N(5)#3   | 107.58(18) |
| O(5)#2-Cd(2)-N(5)#3 | 91.73(16)  | N(3)-Cd(2)-O(8)#4   | 136.84(17) |
| O(5)#2-Cd(2)-O(8)#4 | 119.01(15) | N(5)#3-Cd(2)-O(8)#4 | 95.32(16)  |
| N(3)-Cd(2)-O(9)#4   | 88.09(15)  | O(5)#2-Cd(2)-O(9)#4 | 174.23(15) |
| N(5)#3-Cd(2)-O(9)#4 | 89.65(16)  | O(8)#4-Cd(2)-O(9)#4 | 55.26(13)  |
| N(3)-Cd(2)-O(4)#2   | 94.73(17)  | O(5)#2-Cd(2)-O(4)#2 | 55.28(15)  |
| N(5)#3-Cd(2)-O(4)#2 | 142.58(16) | O(8)#4-Cd(2)-O(4)#2 | 87.75(14)  |
| O(9)#4-Cd(2)-O(4)#2 | 121.46(15) |                     |            |

<sup>a</sup> Symmetry codes: for **1**: #1  $x + 1, y - 1, z$ ; #2  $-x + 2, -y, -z + 1$ ; #3  $x + 1, y, z + 1$ ; #4  $x, y + 1, z + 1$ ; #5  $-x + 1, -y, -z + 2$ .

For **2**, #1  $x - 1, y, z$ ; #2  $x + 1, y - 1, z + 1$ ; #3  $x, y + 1, z$ ; #4  $x, y + 1, z + 1$ ; #5  $x - 1, y + 1, z - 1$ ; #6  $x, y - 1, z - 1$ ; #7  $x, y - 1, z$ ;

#8  $x + 1, y, z$

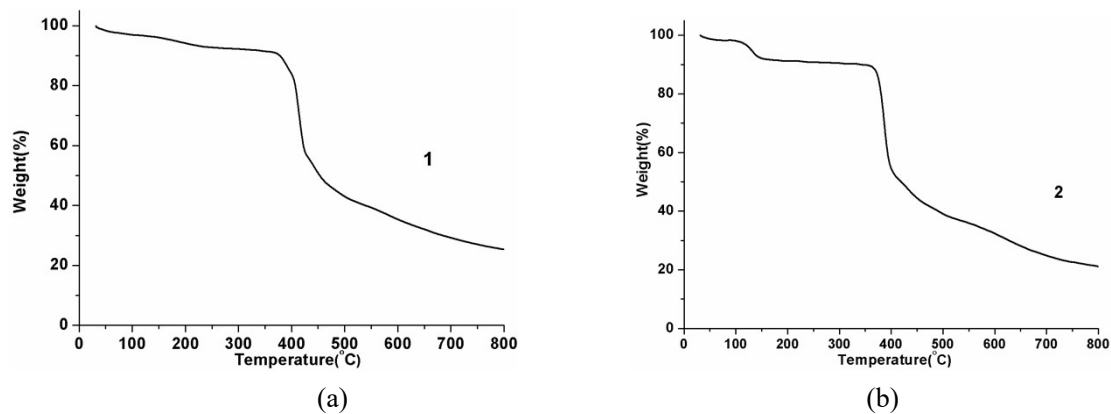

**Fig. S6** (a) The TGA curves for **1**; (b) The TGA curves for **2**.

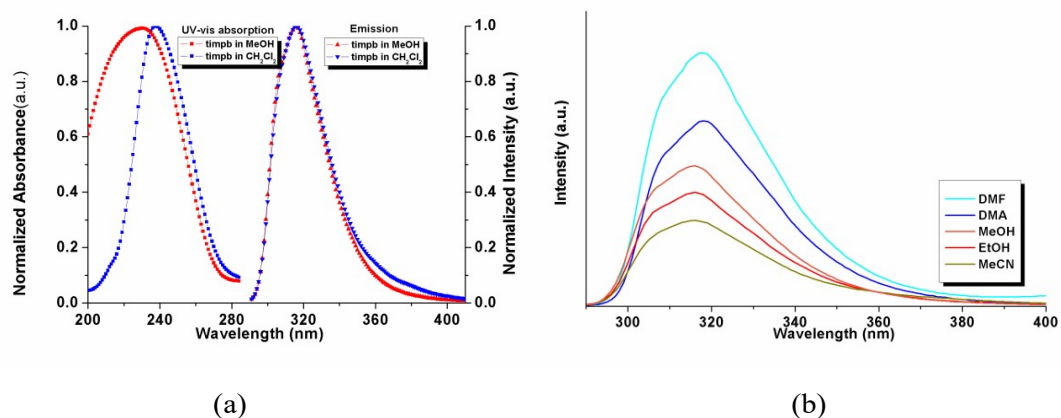

**Fig. S7** (a) UV-visible absorbance (left) and emission spectra (right) of timpb in dilute methanol or dichloromethane solutions ( $1 \times 10^{-4}$  mg mL $^{-1}$ ); (b) Fluorescence emission spectra of timpa in different organic solvents.

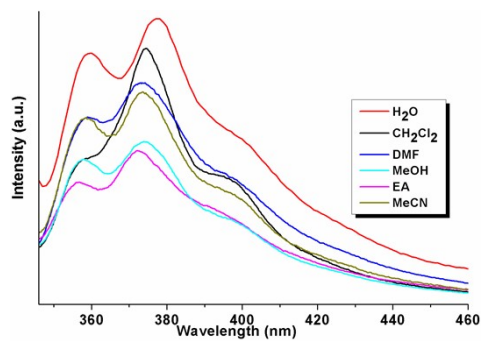

**Fig. S8** Fluorescence emission spectra of **1** in different organic solvents.

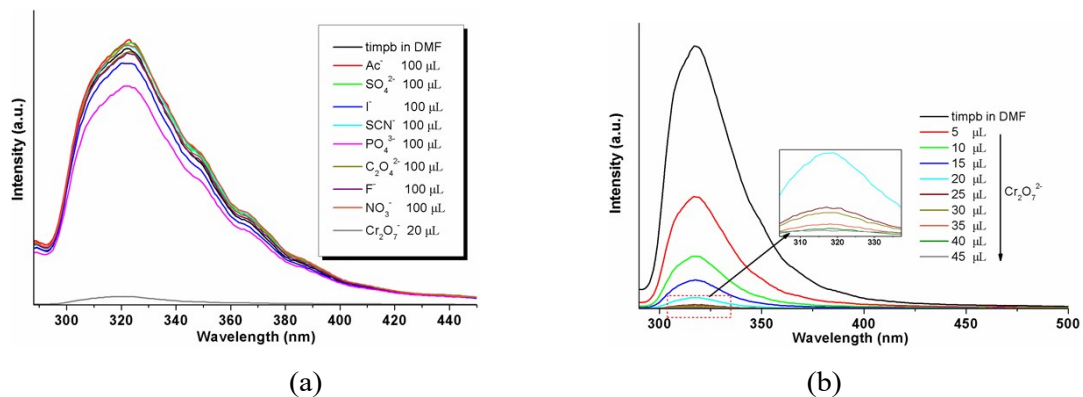

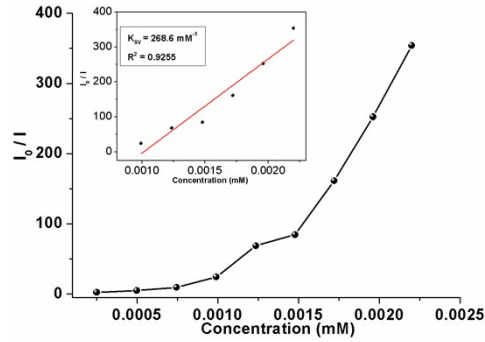

(c)

**Fig. S9** (a) Fluorescent sensing responses of timpb ( $10^{-6}$  M) upon addition of 100  $\mu$ L of various anions ( $10^{-4}$  M) in water; (b) Fluorescence titration profile of timpb ( $10^{-6}$  M) with successively increasing concentration of  $\text{Cr}_2\text{O}_7^{2-}$  ions ( $10^{-4}$  M) from 5 to 45  $\mu$ L; (c)  $K_{\text{sv}}$  plot of timpb for sensing of  $\text{Cr}_2\text{O}_7^{2-}$  (inset: the linear correlation at higher concentrations).

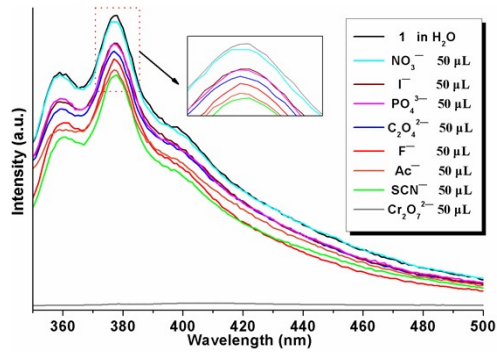

(a)

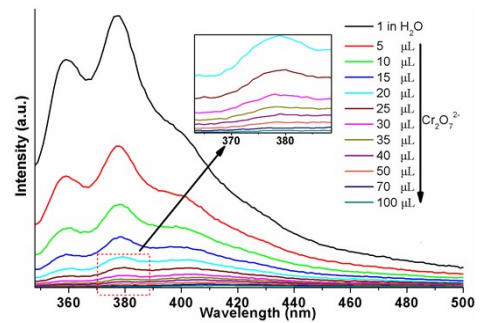

(b)

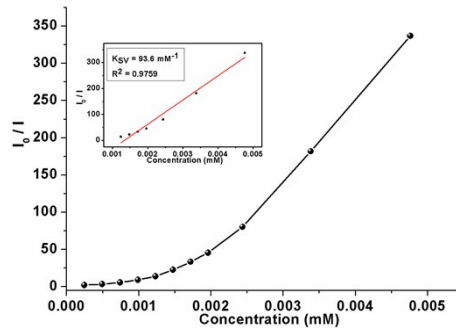

(c)

**Fig. S10** (a) Fluorescent sensing responses of **1** upon addition of 50  $\mu$ L of various anions ( $10^{-4}$  M) in water; (b) Fluorescence titration profile of **1** with successively increasing concentration of  $\text{Cr}_2\text{O}_7^{2-}$  ions ( $10^{-4}$  M) from 5 to 100  $\mu$ L; (c)  $K_{\text{sv}}$  plot of **1** for sensing of  $\text{Cr}_2\text{O}_7^{2-}$  (inset: the linear correlation at higher concentrations).



**Table S2.** Comparison of the detection limits of previously reported sensors with our work for the detection of  $\text{Cu}^{2+}$ ,  $\text{Fe}^{3+}$  or  $\text{Cr}_2\text{O}_7^{2-}$  ions

| Sensor                                                                                                          | ions                         | LOD                                 | Ref. |
|-----------------------------------------------------------------------------------------------------------------|------------------------------|-------------------------------------|------|
| Acetylenic-indole conjoined organosilatrane                                                                     | $\text{Cu}^{2+}$             | 0.41 $\mu\text{M}$                  | 33a  |
| Graphene quantum dots                                                                                           | $\text{Cu}^{2+}$             | 0.226 $\mu\text{M}$                 | 33b  |
| Rhodamine spirolactam derivative                                                                                | $\text{Cu}^{2+}$             | $3 \times 10^{-4}$ $\mu\text{M}$    | 33c  |
| Inclusion complex with $\beta$ -cyclodextrin and 1,5-Dihydroxyanthraquinone                                     | $\text{Cu}^{2+}$             | 10 nM                               | 33d  |
| 4-bromo-2-hydroxyben Rhodamine B hydrazide                                                                      | $\text{Cu}^{2+}$             | $1.7 \times 10^{-4}$ $\mu\text{M}$  | 33e  |
| Zn(II)-MOFs                                                                                                     | $\text{Fe}^{3+}$             | $2.75 \times 10^{-3}$ $\mu\text{M}$ | 34a  |
|                                                                                                                 | $\text{Cr}_2\text{O}_7^{2-}$ | $4.43 \times 10^{-4}$ $\mu\text{M}$ |      |
| $\{\text{Eu}(\text{L})(\text{H}_2\text{O})\}_n \cdot 7\text{H}_2\text{O}$                                       | $\text{Fe}^{3+}$             | 0.67 $\mu\text{M}$                  | 34b  |
| $\text{H}_3\text{L} = 5-(3',5'\text{-dicarboxylphenyl})\text{picolinic acid}$                                   | $\text{Cr}_2\text{O}_7^{2-}$ | 0.32 $\mu\text{M}$                  |      |
| $\{[(\text{CH}_3)_2\text{NH}_2]_4[\text{Ca}_2\text{Zn}_4(\text{L})_4] \cdot 4\text{DMF}\}_n$                    | $\text{Fe}^{3+}$             | 18.8 $\mu\text{M}$                  | 34c  |
| $\text{H}_4\text{L} = 5,5'\text{-}(\text{propanen-1,3-diyl})\text{-bis}(\text{IJoxy})\text{diisophthalic acid}$ | $\text{Cr}_2\text{O}_7^{2-}$ | 29.1 $\mu\text{M}$                  |      |
| $\text{Eu}^{3+}@\text{MIL-124}$                                                                                 | $\text{Fe}^{3+}$             | 0.28 $\mu\text{M}$                  | 34d  |
| 2,2'-bisbenzimidazole derivative                                                                                | $\text{Fe}^{3+}$             | $1.0 \times 10^{-6}$ $\mu\text{M}$  | 34e  |
| $\{[\text{Cu}(\text{L})_2(\text{H}_2\text{O})_2] \cdot (\text{SiF}_6)(\text{H}_2\text{O})\}_n$                  | $\text{Cr}_2\text{O}_7^{2-}$ | 0.79 $\mu\text{M}$                  | 35a  |
| $\text{L} = 4,4'\text{-azobispyridine}$                                                                         |                              |                                     |      |
| $\{[\text{Zn}_2(\mu_3\text{-OH})(\text{cpta})(4,4'\text{-bipy})] \cdot \text{H}_2\text{O}\}_n$                  | $\text{Cr}_2\text{O}_7^{2-}$ | $6.91 \times 10^{-3}$ $\mu\text{M}$ | 35b  |
| $\text{H}_3\text{cpta} = 2\text{-}(\text{-carboxyphenoxy})\text{terephthalic acid}$                             |                              |                                     |      |
| $[\text{Ln}(\text{TCPB})(\text{DMF})_3]_n$                                                                      | $\text{Cr}_2\text{O}_7^{2-}$ | $3.0 \times 10^{-4}$ $\mu\text{M}$  | 35c  |
| $\text{H}_3\text{TCPB} = 1,3,5\text{-tris}(1\text{-}(2\text{-carboxyphenyl})\text{-1H-pyrazol-3-yl})$           |                              |                                     |      |
| $[\text{Cd}(\text{TPA})(\text{BIYB})]_n$                                                                        | $\text{Cr}_2\text{O}_7^{2-}$ | $2.4 \times 10^{-4}$ $\mu\text{M}$  | 35d  |
| $\text{H}_2\text{TPA} = 3,3'\text{-thiodipropionic acid}$                                                       |                              |                                     |      |
| $\text{BIYB} = 4,4\text{-bis}(\text{imidazol-1-ylmethyl})\text{biphenyl}$                                       |                              |                                     |      |
| Water-soluble carbon dots                                                                                       | $\text{Cr}_2\text{O}_7^{2-}$ | 140 nM                              | 35e  |
| $\{[\text{Tb}(\text{dppa})(\text{H}_2\text{O})_2] \cdot \text{dima} \cdot \text{H}_2\text{O}\}_n$               | $\text{Cr}_2\text{O}_7^{2-}$ | 0.55 $\mu\text{M}$                  | 35f  |
| $\text{H}_4\text{dppa} = 5\text{-}(3', 4'\text{-dicarboxylphenoxy})\text{isophthalic acid}$                     |                              |                                     |      |
| dima = dimethylamine                                                                                            |                              |                                     |      |

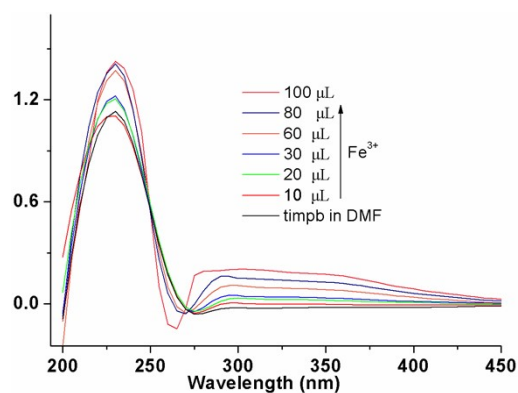

(a)

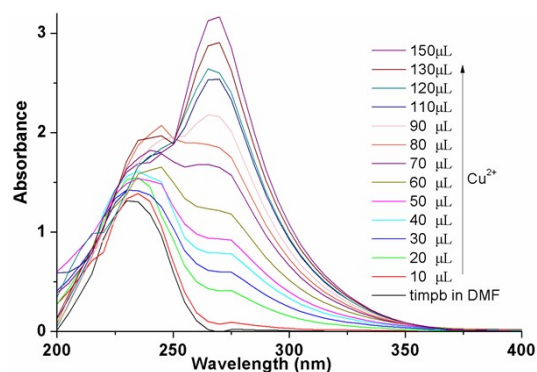

(b)

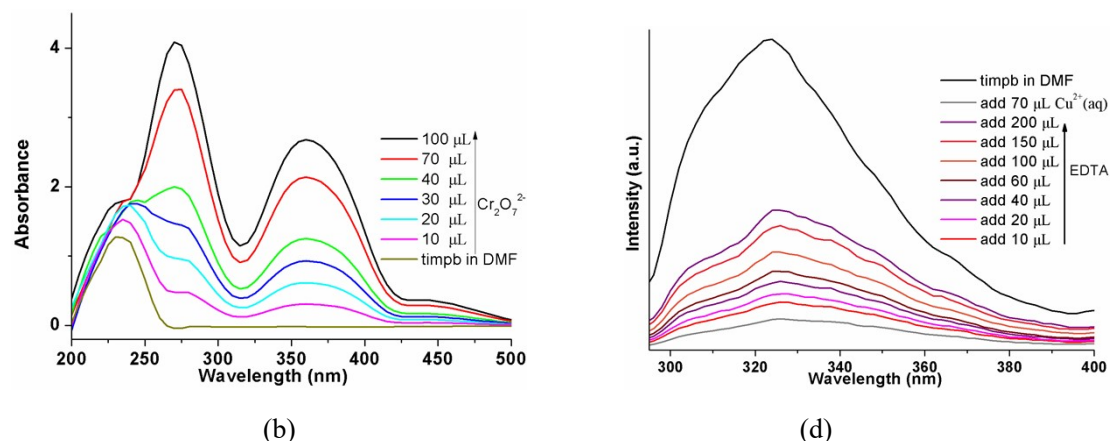

**Fig. S11** (a) UV-visible absorbance spectra of timpb ( $10^{-6}$  M) with successively increasing concentration of  $\text{Fe}^{3+}$  ions ( $10^{-4}$  M) from 10 to 100  $\mu\text{L}$ ; (b) UV-visible absorbance spectra of timpb ( $10^{-6}$  M) with successively increasing concentration of  $\text{Cu}^{2+}$  ions ( $10^{-4}$  M) from 10 to 150  $\mu\text{L}$ ; (c) UV-visible absorbance spectra of timpb ( $10^{-6}$  M) with successively increasing concentration of  $\text{Cr}_2\text{O}_7^{2-}$  ions ( $10^{-4}$  M) from 10 to 100  $\mu\text{L}$ ; (d) Fluorescent recovery responses of 2 mL timpb ( $10^{-6}$  M) + 70  $\mu\text{L}$   $\text{Cu}^{2+}$  ions ( $10^{-4}$  M) upon addition of EDTA ( $10^{-4}$  M).

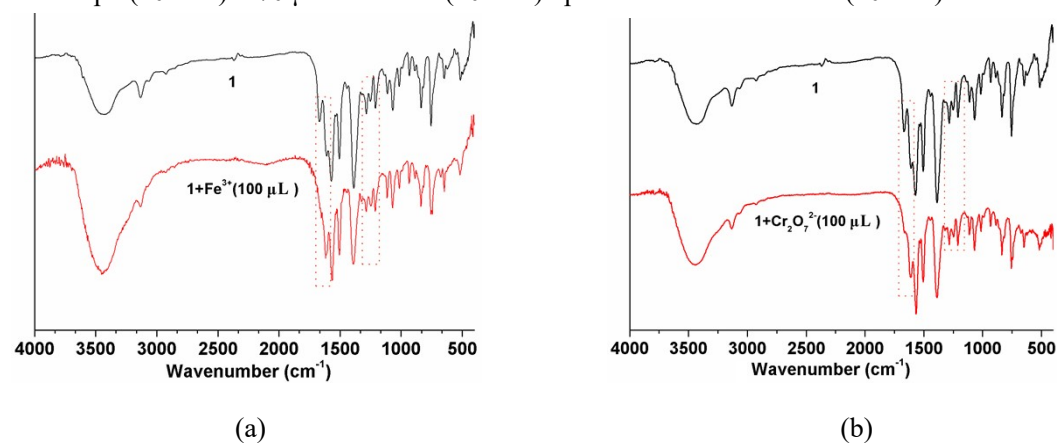

**Fig. S12** FTIR spectra of **1** before and after sensing concentrations of  $\text{Fe}^{3+}$  (a) and  $\text{Cr}_2\text{O}_7^{2-}$  (c) at room temperature.

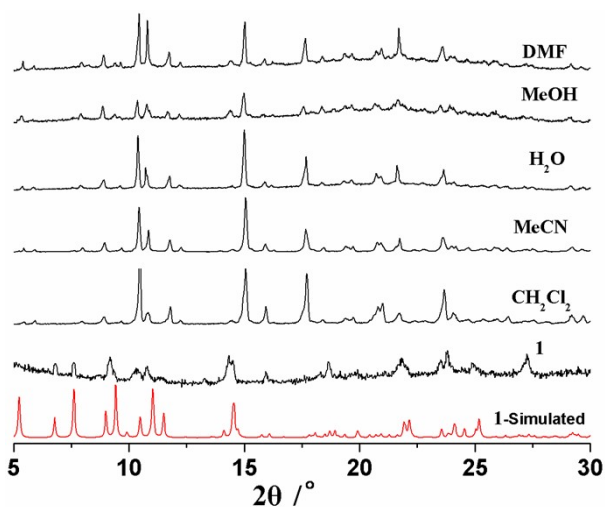

**Fig. S13** PXRD patterns exhibited by complex **1** after immersion in various solvents for 3 days.

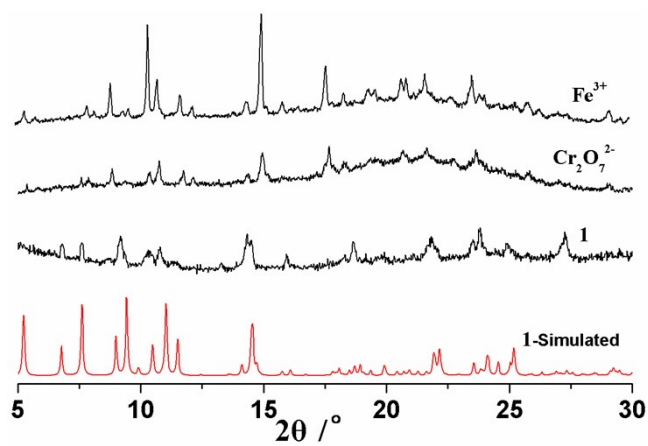

**Fig. S14** PXR D patterns exhibited by complex **1** after immersion in aqueous solutions containing  $\text{Fe}^{3+}$  or  $\text{Cr}_2\text{O}_7^{2-}$ .

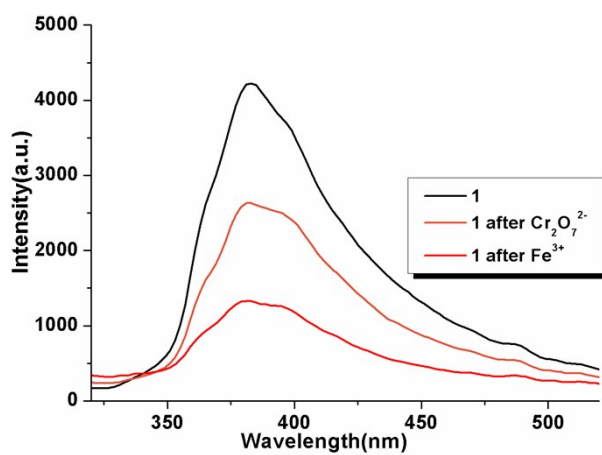

**Fig. S15** The emission spectra of **1** in the solid state after immersion in aqueous solutions containing  $\text{Fe}^{3+}$  or  $\text{Cr}_2\text{O}_7^{2-}$ .
